# Supplementary material for: Outcomes of catheter-directed thrombolysis vs. standard medical therapy in patients with acute submassive pulmonary embolism
Source: PubMed Central journal article supplement — Pulm Circ. 2020 Apr 8;10(1):2045894019898368. doi: 10.1177/2045894019898368 (PMC7144676; doi:10.1177/2045894019898368), 2020-04-08

# Supplemental Figure One

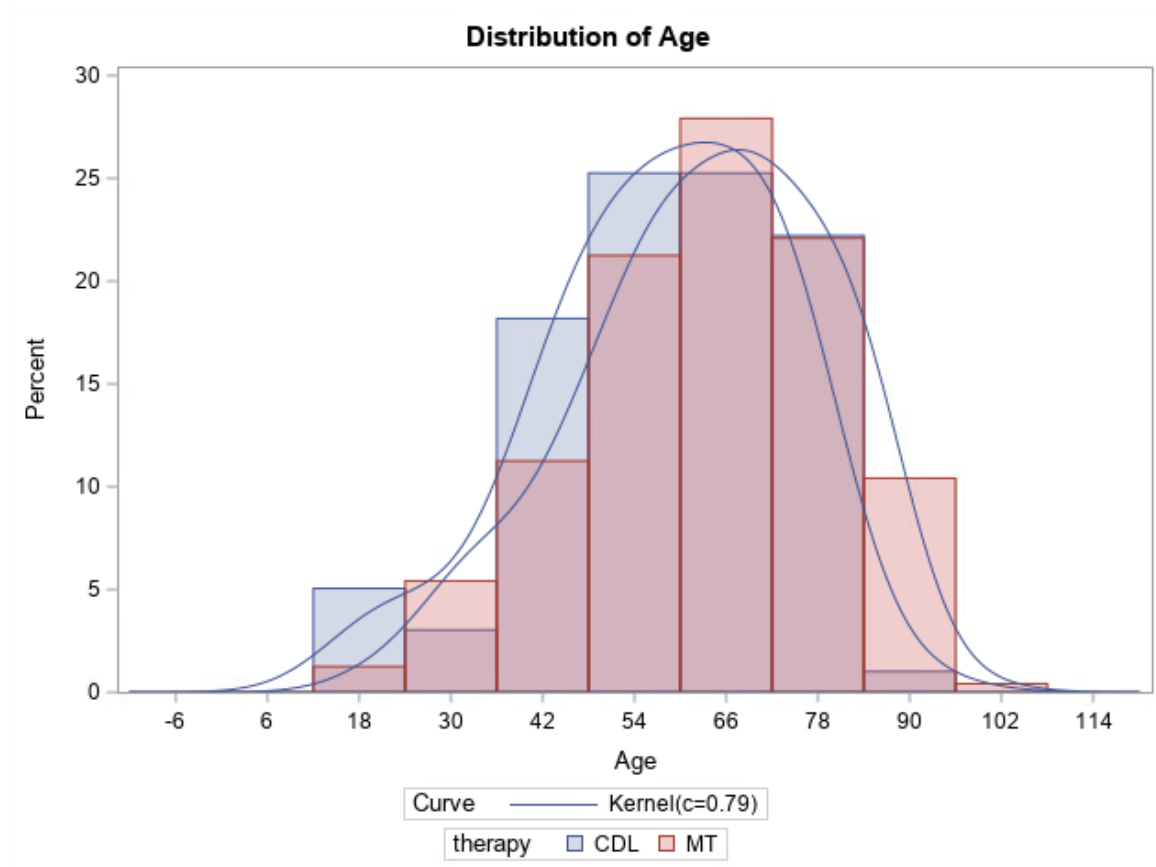

## Supplemental Figure Two

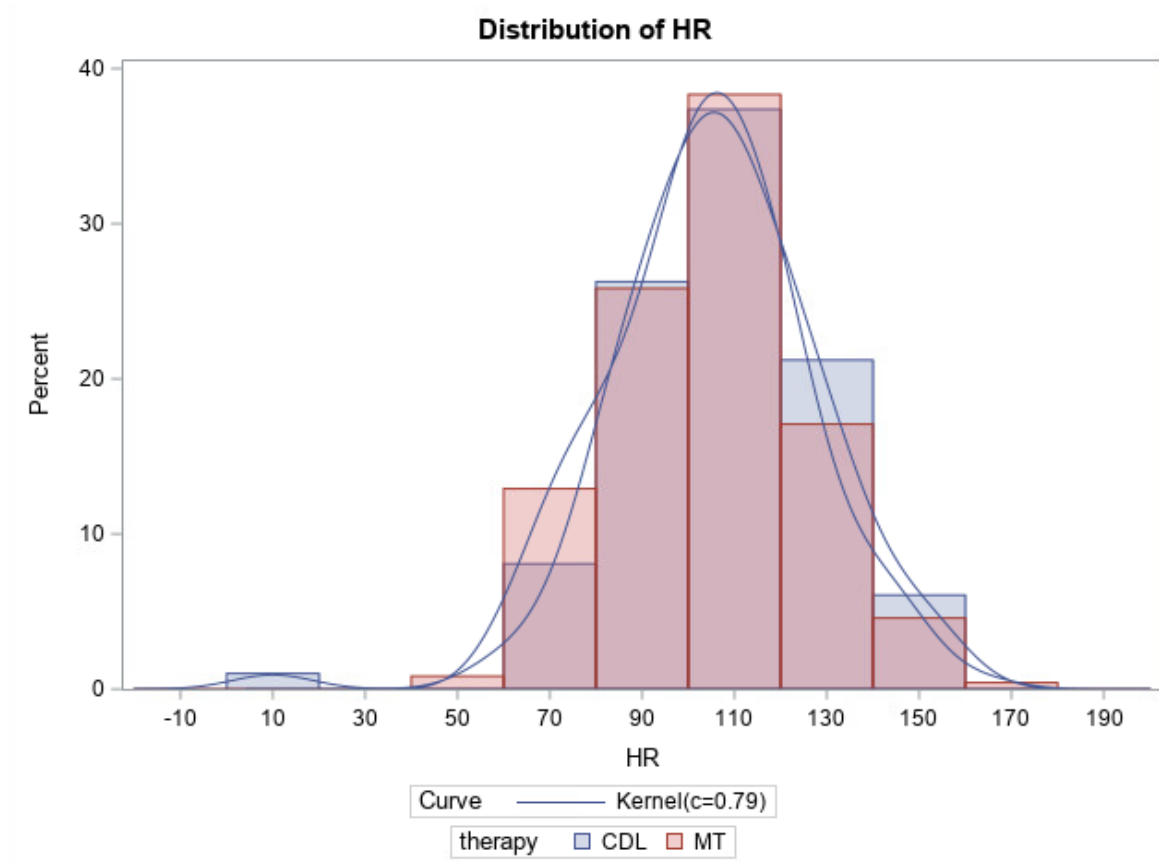

### Supplemental Figure Three

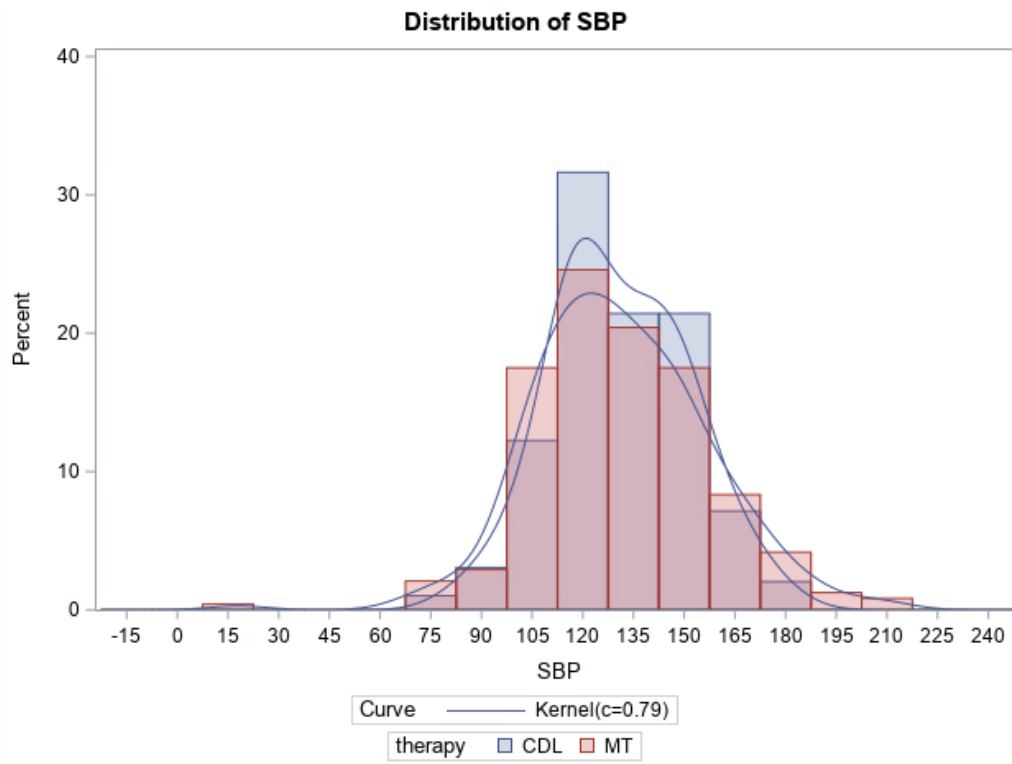

## Supplemental Figure Four

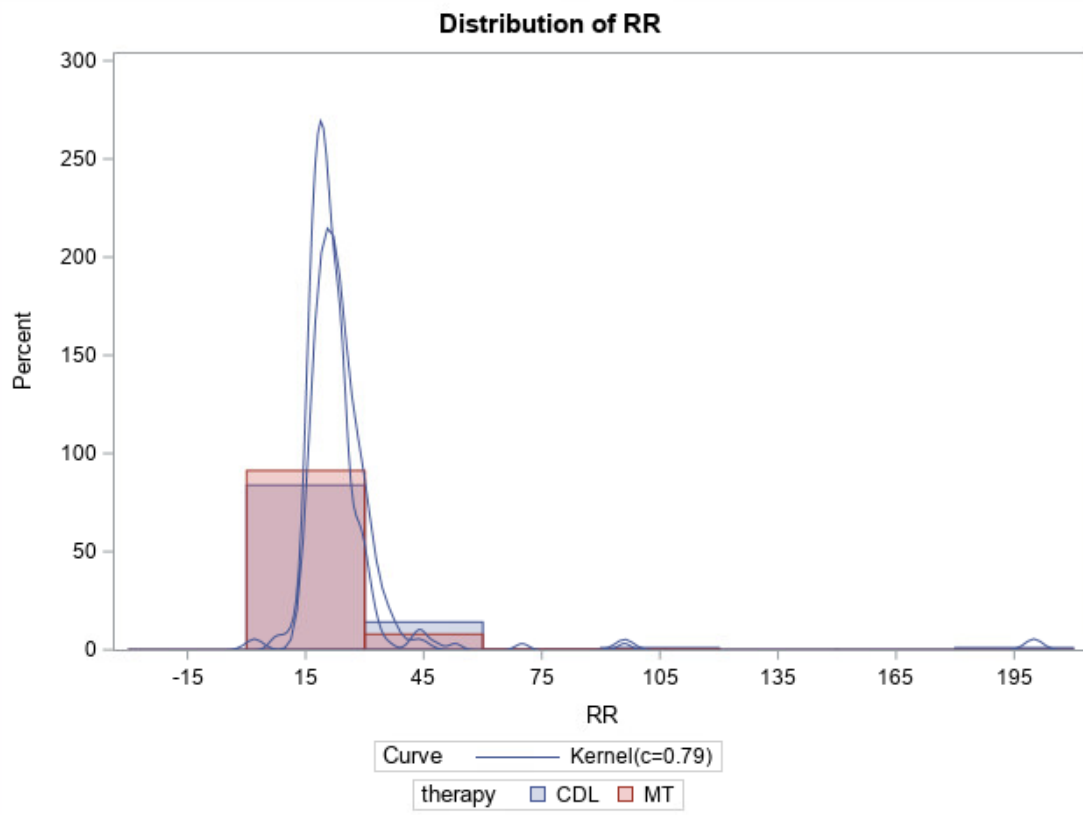

# Supplemental Figure Five

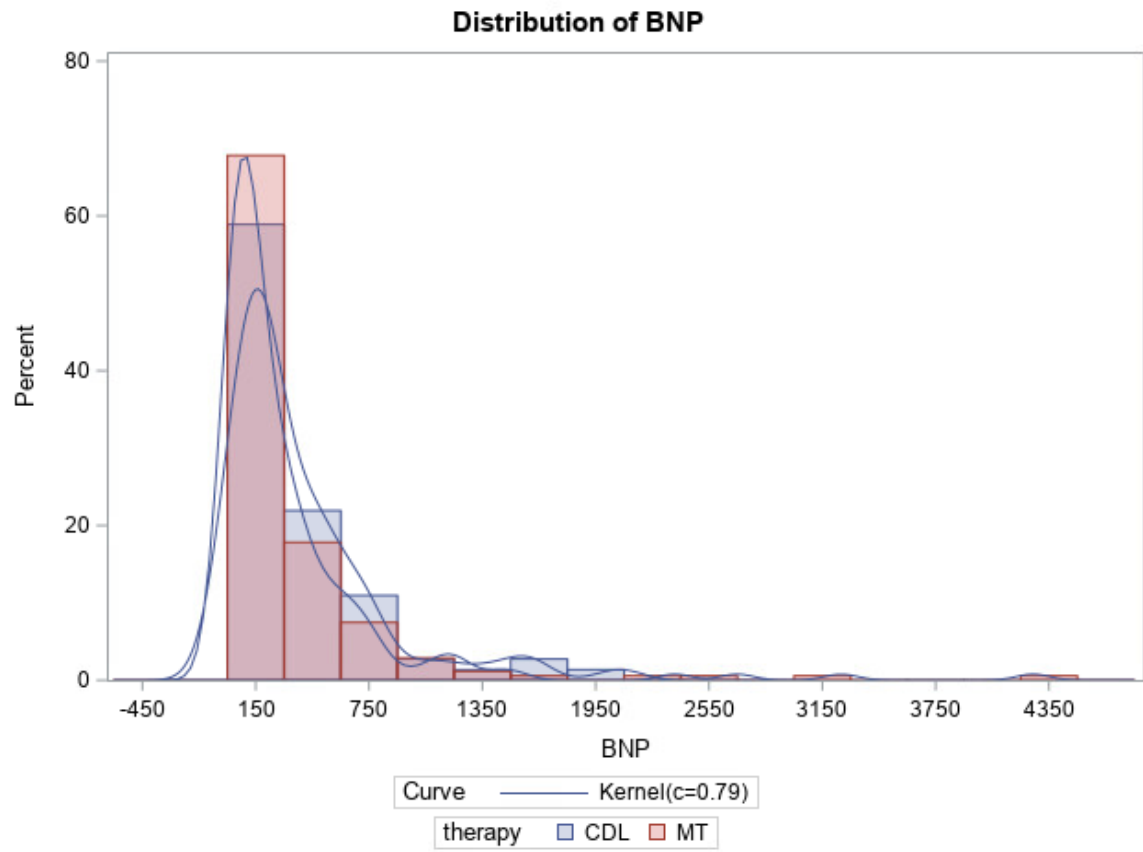

### Supplemental Figure Six

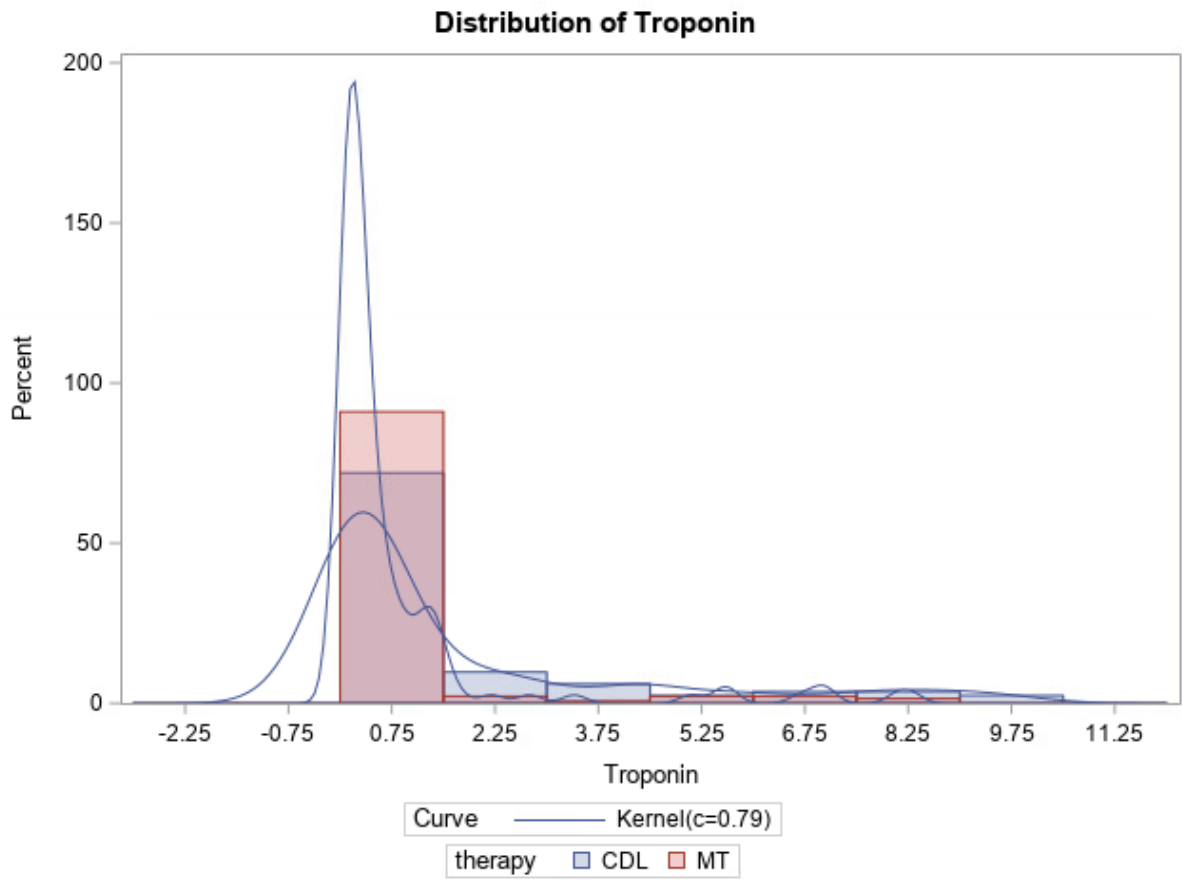

Supplement: PUL898368_Supplemental_Material.pdf [file PUL898368_Supplemental_Material.pdf]
